# Supplementary material
Source: HighWire-hosted journal article supplement (https://tsaco.bmj.com/content/4/1/e000303)
Supplement: inline-supplementary-material-1 [file inline-supplementary-material-1.docx]

**Appendix A**

The following Aldrete chart contains the basic scoring system for discharge assessment.

Patient score must be at a minimum of 18 for discharge.11

| Patient Sign | Criterion | Score |
| --- | --- | --- |
| Activity  Neuro /Motor of affected extremities | Able to move and feel  Able to move but diminishes feeling  a) no movement (b) completely numb | 2  1  0 |
| Respiration/Airway | Able to breathe deeply and cough, clear airway & breath  Sounds, >14 resp/min  Mild shortness of breath, mild pain associated with  breathing, slight tachypnea (24-30 resp / min), mild sore throat  Significant pain with breathing, severe sore throat,  irregular breathing, significant tachypnea (>30 resp/min), wheezing | 2  1  0 |
| Circulation (BP&HR) | +/- 20% baseline for 30 minutes, 2-3+ pulse & <3sec cap refill to affected extremity.  a)+/- 50% baseline for 30 minutes b)1+pulse c) >3 sec cap refill  a)>50% deviation from baseline b)pulse absent c)no cap refill | 2  1  0 |
| Consciousness | Fully awake, Alert & oriented X 4  Easily arousable to verbal stimulation, oriented X 3  a) disoriented b) unresponsive to stimulation | 2  1  0 |
| Oxygen Saturation | SpO2 >95% on room air  a) SpO2 >92-94% on room air b) O2 (patient’s baseline, hx of COPD, asthma, smoker, etc.)  a) SpO2 <92% on room air b)O2 (pt’s baseline, hx) | 2  1  0 |
| Wound/Dressing | Clean and dry or stabilized  Mildly exceeding expected post-op drainage  Significant drainage | 2  1  0 |
| Pain | Minimal pain, easily tolerated (level 0-4/10 pain w/ or w/out oral meds)  Moderate pain, controlled by oral meds (level 5-7/10 pain)  Severe pain, requires IV or IM medication (level 8-10/10 pain) | 2  1  0 |
| Ambulation | Can stand and walk a straight line  a) Dizzy when standing b) Unsteady gait  Dizzy when supine | 2  1  0 |
| PO Intake/ Hydration Status | Able to tolerate PO fluids  a) Nausea controlled by meds b) no PO intake  a) Uncontrolled nausea b) Emesis within last 30 mins. | 2  1  0 |
| Urine Output | 1. Has voided b) not required for discharge   Unable to void but comfortable, no bladder distension  Unable to void, uncomfortable or bladder distention | 2  1  0 |
